# Supplementary material for: Effect of Different Species of Prorocentrum Genus on the Japanese Oyster Crassostrea gigas Proteomic Profile
Source: MDPI journal article supplement (doi:10.3390/toxins13070504), 2021-07-20
Supplement: s1 [file toxins-1267767-supplementary.pdf › toxins-1267767-supplementary.pdf]

# Supplementary Materials: Effect of Different Species of *Prorocentrum* Genus on the Japanese Oyster *Crassostrea gigas* Proteomic Profile

Miguel Angel Matus Hernández and Norma Yolanda Hernández Saavedra

**Table S1.** Summary of three-way analysis of variance (ANOVA) of *Crassostrea gigas* exposure to whole live cells of *Prorocentrum* spp.

|                                          | Df  | Sum Sq | Mean Sq | F value | Pr(>F)       |
|------------------------------------------|-----|--------|---------|---------|--------------|
| Species                                  | 3   | 4.9    | 1.64    | 4.10    | 0.008135 **  |
| Exposure time                            | 3   | 921.4  | 307.13  | 765.818 | <2e-16 ***   |
| Cell concentration                       | 4   | 1.6    | 0.41    | 1.025   | 0.396954     |
| Species:Exposure time                    | 9   | 55.3   | 6.14    | 15.319  | <2e-16 ***   |
| Species:Cell concentration               | 8   | 0.3    | 0.03    | 0.080   | 0.999640     |
| Exposure time:Cell concentration         | 12  | 16.1   | 1.34    | 3.43    | 0.000299 *** |
| Species:Exposure time:Cell concentration | 24  | 19.7   | 0.82    | 2.051   | 0.005696 **  |
| Residuals                                | 128 | 51.3   | 0.40    |         |              |

**Table S2.** Summary of three-way analysis of variance (ANOVA) of *Crassostrea gigas* exposure to aqueous extract (AE) of *Prorocentrum* spp.

| AE                                  | Df | Sum Sq | Mean Sq | F value | Pr(>F)       |
|-------------------------------------|----|--------|---------|---------|--------------|
| Species                             | 3  | 10.1   | 3.36    | 7.913   | 0.00011 ***  |
| Exposure time                       | 3  | 339    | 112.99  | 265.856 | <2e-16 ***   |
| Concentration                       | 2  | 1.4    | 0.7     | 1.656   | 0.19742      |
| Species:Exposure time               | 9  | 26.2   | 2.91    | 6.85    | 3.05e-07 *** |
| Species:Concentration               | 4  | 0.9    | 0.22    | 0.512   | 0.72707      |
| Exposure time:Concentration         | 6  | 4.8    | 0.8     | 1.888   | 0.09296      |
| Species:Exposure time:Concentration | 12 | 22     | 1.83    | 4.317   | 2.96e-05 *** |
| Residuals                           | 80 | 34     | 0.42    |         |              |

**Table S3.** Summary of three-way analysis of variance (ANOVA) of *Crassostrea gigas* exposure to organic extract (OE) of *Prorocentrum* spp.

| OE                                  | Df | Sum Sq | Mean Sq | F value | Pr(>F)       |
|-------------------------------------|----|--------|---------|---------|--------------|
| Species                             | 3  | 0.89   | 0.3     | 0.409   | 0.74718      |
| Exposure time                       | 3  | 293.7  | 97.9    | 135.034 | <2e-16 ***   |
| Concentration                       | 2  | 1.39   | 0.69    | 0.958   | 0.388071     |
| Species:Exposure time               | 9  | 25.24  | 2.8     | 3.869   | 0.000419 *** |
| Species:Concentration               | 4  | 0.06   | 0.01    | 0.019   | 0.999268     |
| Exposure time:Concentration         | 6  | 11.5   | 1.92    | 2.644   | 0.021670 *   |
| Species:Exposure time:Concentration | 12 | 7.72   | 0.64    | 0.888   | 0.562656     |
| Residuals                           | 80 | 58     | 0.73    |         |              |

**Table S4.** Relative expression values of regulated protein spots that showed statistical differences ( $p < 0.005$ ) in *Crassostrea gigas* exposure to aqueous extract (AE) of *Prorocentrum* spp.

| Spot ID | Control       | <i>P. lima</i> | <i>P. minimum</i> | <i>P. rhathymum</i> | <i>P. lima</i> | <i>P. minimum</i> | <i>P. rhathymum</i> |
|---------|---------------|----------------|-------------------|---------------------|----------------|-------------------|---------------------|
|         | Original data |                |                   |                     | Processed data |                   |                     |
|         | Whole Cells   |                |                   |                     |                |                   |                     |

|                        |       |       |       |       |        |        |        |
|------------------------|-------|-------|-------|-------|--------|--------|--------|
| 1                      | 1.138 | 1.166 | 1.120 | 0.856 | 0.028  | -0.018 | -0.282 |
| 5                      | 1.212 | 3.966 | 5.003 | 2.739 | 2.754  | 3.792  | 1.528  |
| 8                      | 0.716 | 1.262 | 1.518 | 1.345 | 0.546  | 0.802  | 0.629  |
| 11                     | 1.149 | 0.808 | 0.314 | 1.178 | -0.340 | -0.835 | 0.029  |
| 13                     | 1.117 | 1.130 |       | 1.586 | 0.013  | 0      | 0.468  |
| 14                     | 1.433 |       |       | 1.247 | 0      | 0      | -0.186 |
| 15                     | 4.723 | 5.541 | 5.074 | 6.122 | 0.818  | 0.351  | 1.399  |
| 16                     | 1.733 | 4.312 | 4.784 | 4.049 | 2.579  | 3.051  | 2.317  |
| 21                     | 0.954 | 1.246 | 2.640 | 1.638 | 0.292  | 1.687  | 0.684  |
| 25                     | 3.354 | 5.323 | 1.413 | 5.928 | 1.969  | -1.941 | 2.574  |
| 29                     | 1.938 | 7.362 | 7.053 | 6.715 | 5.424  | 5.115  | 4.777  |
| 30                     | 1.650 | 2.264 | 2.239 | 3.007 | 0.613  | 0.589  | 1.357  |
| 31                     | 2.134 | 0.332 |       |       | -1.802 | 0      | 0      |
| 35                     | 5.529 | 9.017 | 7.555 | 6.826 | 3.488  | 2.026  | 1.297  |
| 36                     | 1.284 | 2.124 | 1.274 | 0.760 | 0.840  | -0.010 | -0.525 |
| 37                     | 2.617 | 2.437 | 4.123 | 3.374 | -0.180 | 1.506  | 0.756  |
| 38                     | 2.027 | 3.594 | 2.547 | 2.791 | 1.567  | 0.520  | 0.764  |
| 39                     | 3.213 | 5.233 | 2.226 | 2.802 | 2.020  | -0.987 | -0.411 |
| 40                     |       |       |       | 1.283 |        |        | 1.283  |
| 41                     |       |       |       | 1.409 |        |        | 1.409  |
| 43                     |       |       | 1.906 |       |        | 1.906  |        |
| 44                     |       | 1.424 |       |       | 1.424  |        |        |
| 45                     |       | 1.238 |       |       | 1.238  |        |        |
| 46                     |       | 0.882 |       |       | 0.882  |        |        |
| 47                     | 1.718 |       |       |       | 0      | 0      | 0      |
| 48                     | 1.411 |       |       |       | 0      | 0      | 0      |
| <b>Aqueous Extract</b> |       |       |       |       |        |        |        |
| 21                     | 1.719 |       |       | 0.423 | 0      | 0      | -1.297 |
| 27                     | 5.823 | 6.338 | 5.576 | 4.471 | 0.515  | -0.246 | -1.351 |
| 38                     | 1.710 | 1.260 |       | 1.228 | -0.451 | 0      | -0.483 |
| 47                     | 1.646 | 1.911 |       |       | 0.265  | 0      | 0      |
| 50                     |       | 0.992 | 1.996 |       | 0.992  | 1.996  |        |
| 55                     |       | 0.314 |       |       | 0.314  |        |        |
| 57                     | 1.542 |       |       |       | 0      | 0      | 0      |
| <b>Organic Extract</b> |       |       |       |       |        |        |        |
| 9                      | 0.374 |       |       | 0.341 | 0      | 0      | -0.033 |
| 17                     | 0.624 | 0.682 | 0.650 | 0.816 | 0.059  | 0.027  | 0.193  |
| 19                     | 0.306 |       | 1.256 | 0.700 | 0      | 0.950  | 0.394  |
| 24                     | 4.380 | 0.903 | 1.975 | 2.576 | -3.477 | -2.405 | -1.804 |
| 29                     | 0.789 |       |       | 0.566 | 0      | 0      | -0.222 |
| 34                     | 0.891 | 0.294 | 0.159 | 0.560 | -0.597 | -0.732 | -0.331 |
| 39                     | 3.644 | 2.899 | 2.625 | 3.641 | -0.745 | -1.019 |        |
| 40                     | 1.222 | 0.613 | 1.079 | 1.857 | -0.609 | -0.143 | 0.635  |
| 50                     | 1.115 |       | 1.400 |       | 0      | 0.285  | 0      |
| 52                     | 1.884 |       | 1.531 |       | 0      | -0.353 | 0      |
| 58                     |       | 0.598 | 0.577 | 0.721 | 0.598  | 0.577  | 0.721  |
| 70                     |       |       | 0.815 |       |        | 0.815  |        |
| 77                     | 4.207 |       |       |       | 0      | 0      | 0      |

Note: The processed data were obtained by subtracting the expression value of each spot with respect to the control value.

**Table S5.** Peptide sequences of protein spots expressed differently and selected for identification by mass spectrometry.

[illegible]

TALAPSTMKMQKEITALAPSTMKVAPEEHPVLLTEAPLNPKVAPEEHPVLLTEAPLNPKSYELPDGQVITI  
 GNERSYELPDGQVITIGNERVAPEEHPVLLTEAPLNPKLCYVALDFEQEMGTAASSSSLEKMQKEITALAP  
 STMKVAPEEHPVLLTEAPLNPKVAPEEHPVLLTEAPLNPKDLYANTVLSGGSTMYPGIADRDLYANTVL  
 SGGSTMYPGIADRSYELPDGQVITIGNERMQKEITALAPSTMKMQKEITALAPSTMKMQKEITALAPSTM  
 KDLYANTVLSGGSTMYPGIADRVAPEEHPVLLTEAPLNPKQEYDESGPSIVHRMQKEITALAPSTMKMQK  
 EITALAPSTMKMQKEITALAPSTMKSYELPDGQVITIGNEREITALAPSTMKIKSYELPDGQVITIGNERDL  
 YANTVLSGGSTMYPGIADREITALAPSTMKIKVAPEEHPVLLTEAPLNPKVAPEEHPVLLTEAPLNPKM  
 QKEITALAPSTMKSYELPDGQVITIGNERLDLAGRDLTDYLMKLDLAGRDLTDYLMKSYELPDGQVITIGN  
 ERSYELPDGQVITIGNERSYELPDGQVITIGNERMQKEITALAPSTMKGYSFTTTAERQEYDESGPSIVHRGY  
 SFTTTAEREIVREITALAPSTMKMQKEITALAPSTMK

17 SLALQINDEQLKSLALQINDEQLKSLALQINDEQLKQLTDAHNTFNLFDK

IIEEEAVGKQVDYYDVLYLHNVGKQVDYYDVLYLHNVGKQVDYYDVLYLHNVGKEYRFRIIEEEEAVGKA  
 GRISYDEYAPRAGRISYDEYAPRFRIIEEEEAVGKAGRISYDEYAPRFRIIEEEEAVGKAGRISYDEYAPRFRIIE  
 EAVGKFRIIEEEEAVGKISYDEYAPRISYDEYAPRFRIIEEEEAVGKFRIIEEEEAVGKISYDEYAPRAGRISYDEYA  
 PRAGRISYDEYAPRISYDEYAPRISYDEYAPRISYDEYAPRIIEEEEAVGKIIEEEEAVGKIIEEEEAVGKSYELPDG  
 QVITIGNERSYELPDGQVITIGNERVAPEEHPVLLTEAPLNPKVAPEEHPVLLTEAPLNPKSYELPDGQVITI  
 GNERVAPEEHPVLLTEAPLNPKSYELPDGQVITIGNERSYELPDGQVITIGNERVAPEEHPVLLTEAPLNPK  
 VAPEEHPVLLTEAPLNPKVAPEEHPVLLTEAPLNPKSYELPDGQVITIGNERLNDQIGEYEGEATLRLN  
 DQIGEYEGEATLRIGGLEDEVSKQRIGGLEDEVSKQRLASEKECAELRIGGLEDEVSKQRRLLQDDIARAQ  
 AVEEDLTFRIGGLEDEVSKQRNVIDELSKEKLASEKECAELRSGSLDFFEVYNVLQKIFQSLDVKNEKVG  
 EDFEEVDKDKNHTGPLSYEEFLKVGEDFEEVDKDKIFQSLDVKNEKYGFEQSTYYDLKVGISDPELFIPP  
 RYGFEQSTYYDLKYGFEQSTYYDLKFLVYDETMQRILVATNLFGRGLAITFVSDETDAKGLAITFVSDETDA  
 KVVQLDYYVENREAIFFELSEFTPGRR

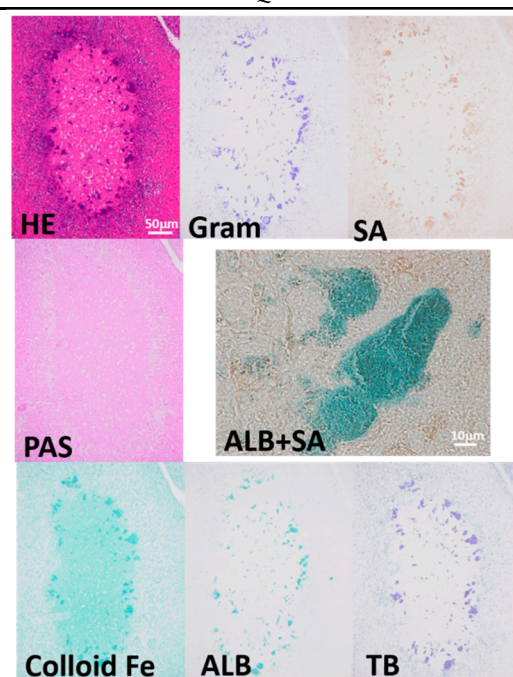

**Figure S1.** A large infected necrotic lesion in the liver of a mouse 10 days after OJ-1 injection. After injection of OJ-1  $\times 1$  solution, some mice survived and their general condition was fine 10 days after bacterial injection; however, large extracellular necrotic lesions were sometimes developed in the liver. The lesion was examined for biofilm formation. The result was similar to the lesion 24 h after injection (Figure 1); many MRSA colonies developed around the necrotic focus, and they were accompanied with acidic polysaccharides detected by Colloidal Fe, ALB, and TB staining, but were negative for neutral polysaccharides (PAS). The double staining of ALB + SA showed a biofilm matrix containing acidic mucopolysaccharides.

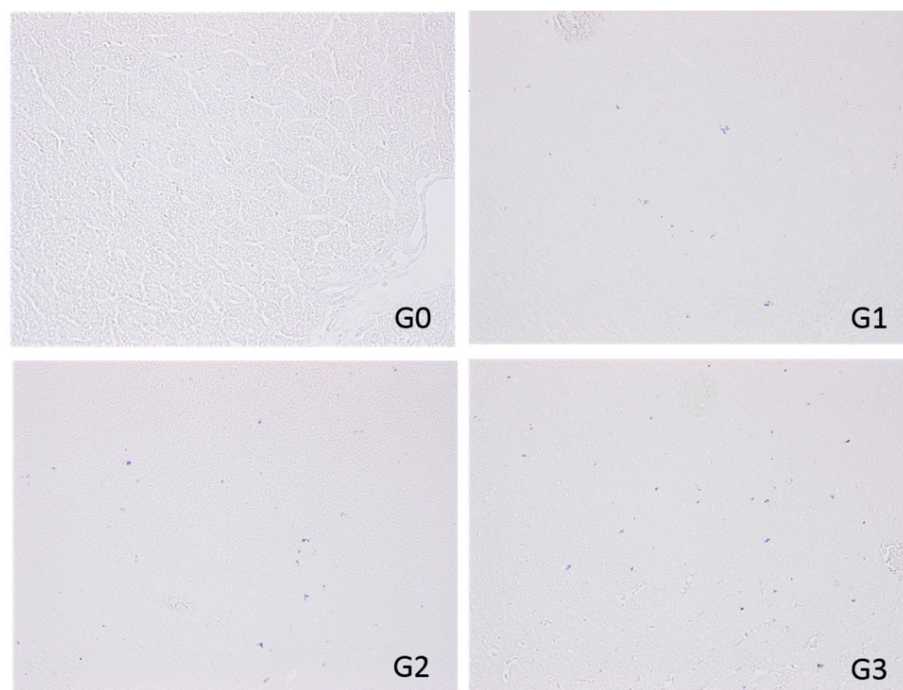

**Figure S2.** Reference picture for grading of gram-positive MRSA in the liver. Each liver picture was evaluated using a set of reference pictures for the grading of gram-positive MRSA.

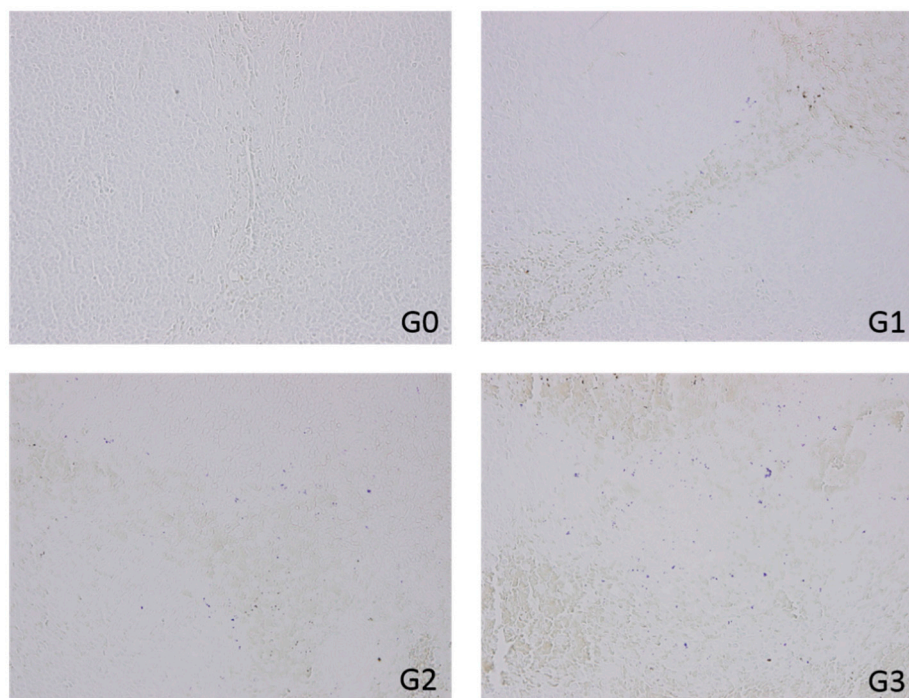

**Figure S3.** Reference picture for grading of gram-positive MRSA in the spleen. Each spleen picture was evaluated using a set of reference pictures for the grading of gram-positive MRSA.



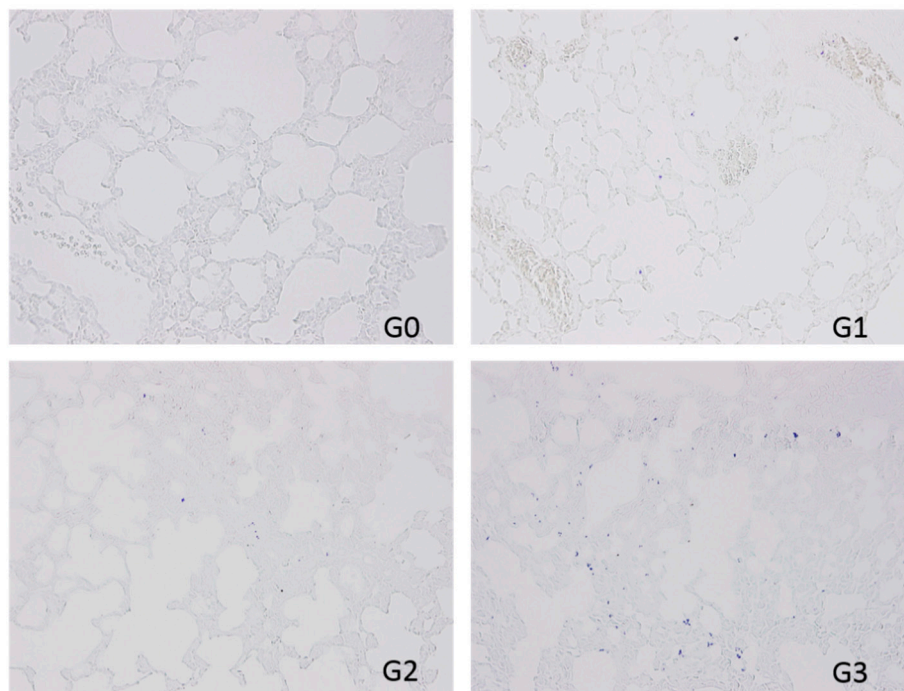

**Figure S4.** Reference picture for grading of gram-positive MRSA in the lung. Each lung picture was evaluated using a set of reference pictures for the grading of gram-positive MRSA.

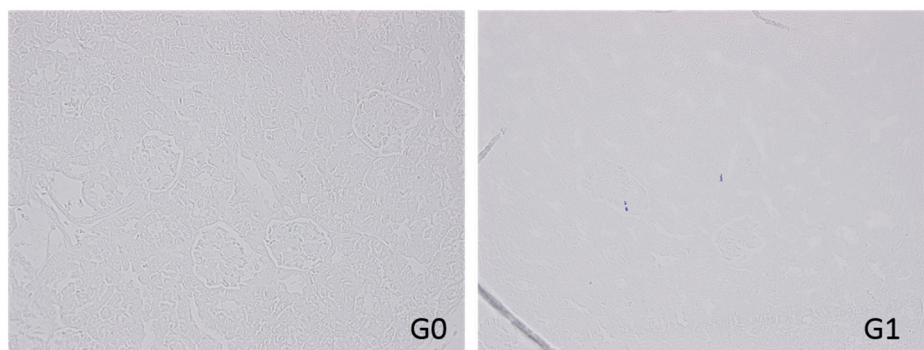

**Figure S5.** Reference picture for grading of gram-positive MRSA in the kidney. Each kidney picture was evaluated using a set of reference pictures for the grading of gram-positive MRSA.
